# Supplementary material for: Novel Autoantibodies Related to Cell Death and DNA Repair Pathways in Systemic Lupus Erythematosus
Source: PubMed Central journal article supplement (PMC6818352; doi:10.1016/j.gpb.2018.11.004), 2019-09-05

**A Network 1: cell cycle, DNA replication, and repair**

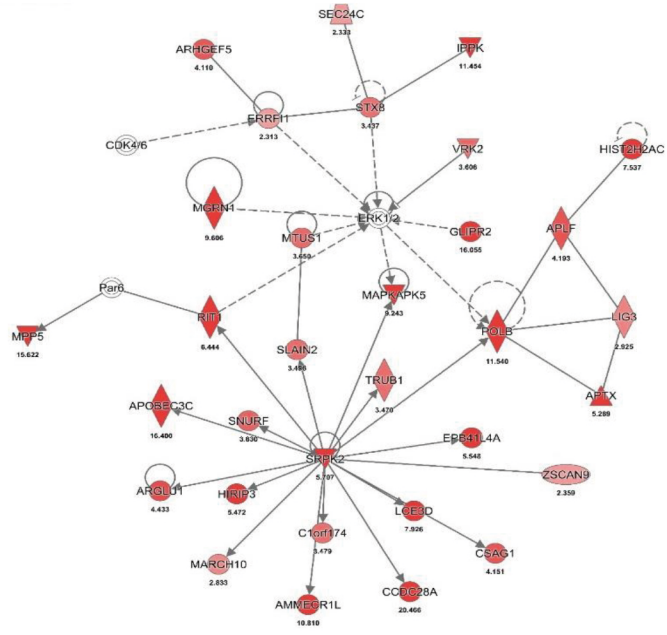

**B Network 2: RNA post transcriptional modification**

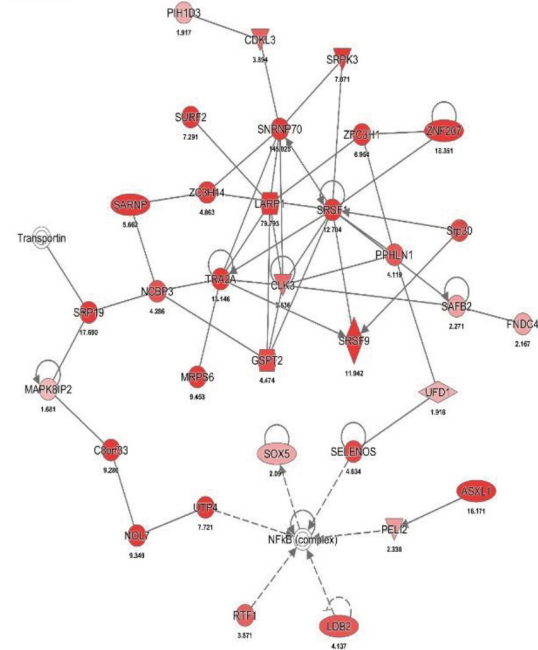

**C Network 3: cellular assembly and organization**

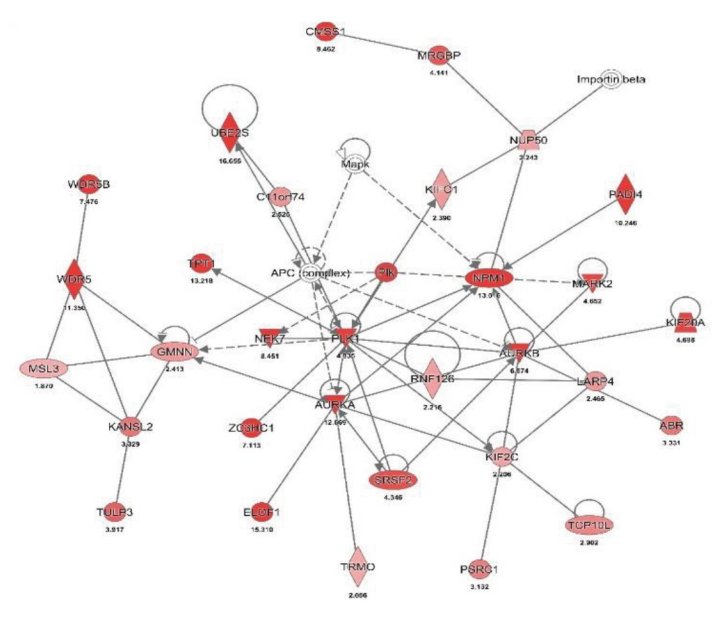

**D Network 4: cell cycle and RNA post transcriptional modification**

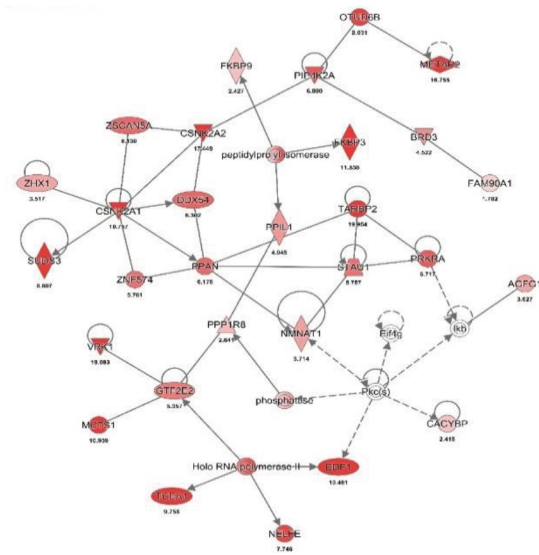

**E Network 5: cell-to-cell signaling, cell death, and survival**

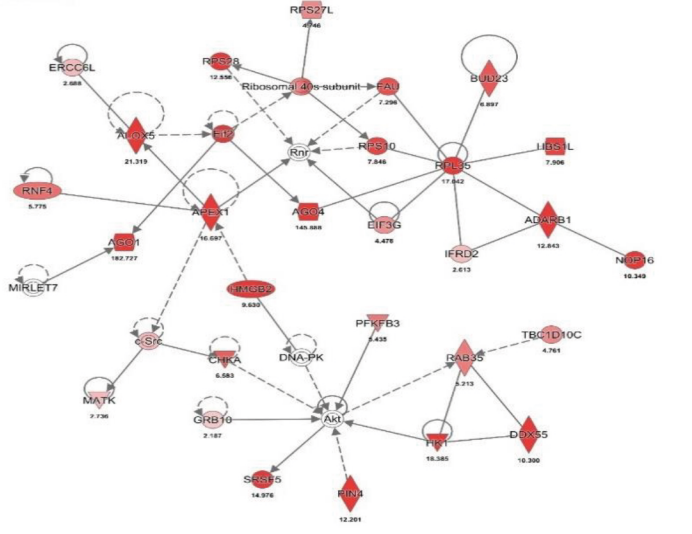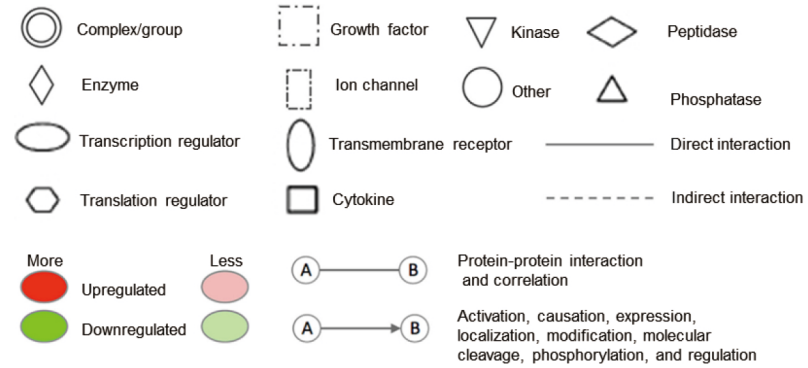

Supplement: mmc1.pdf [file mmc1.pdf]
