# Supplementary material for: Novel Autoantibodies Related to Cell Death and DNA Repair Pathways in Systemic Lupus Erythematosus
Source: PubMed Central journal article supplement (PMC6818352; doi:10.1016/j.gpb.2018.11.004), 2019-09-05
Supplement: mmc2.pdf [file mmc2.pdf]

**A 125 autoantigens involved in cell death and survival**

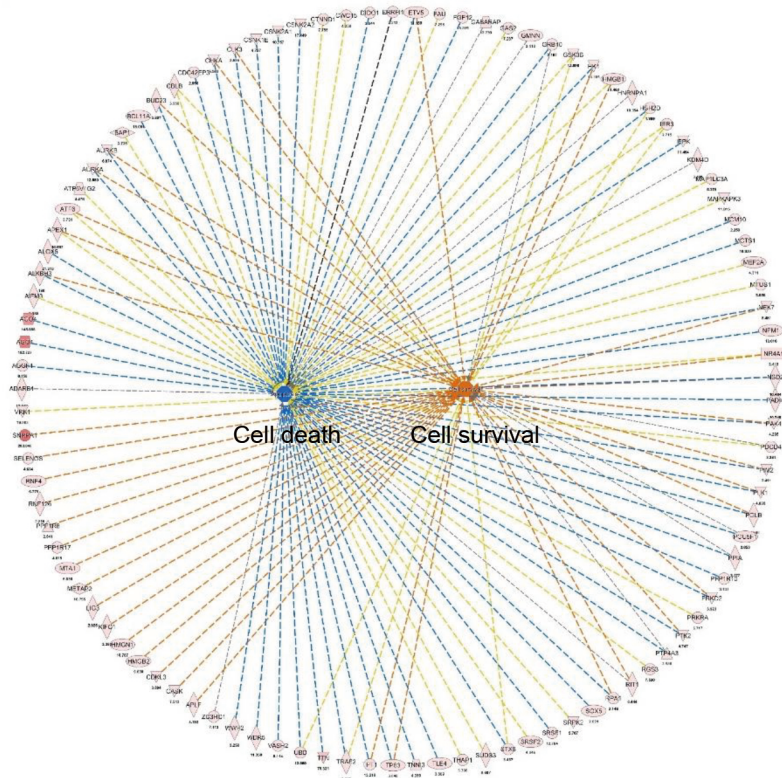

**B 85 autoantigens involved in cell cycle regulation**

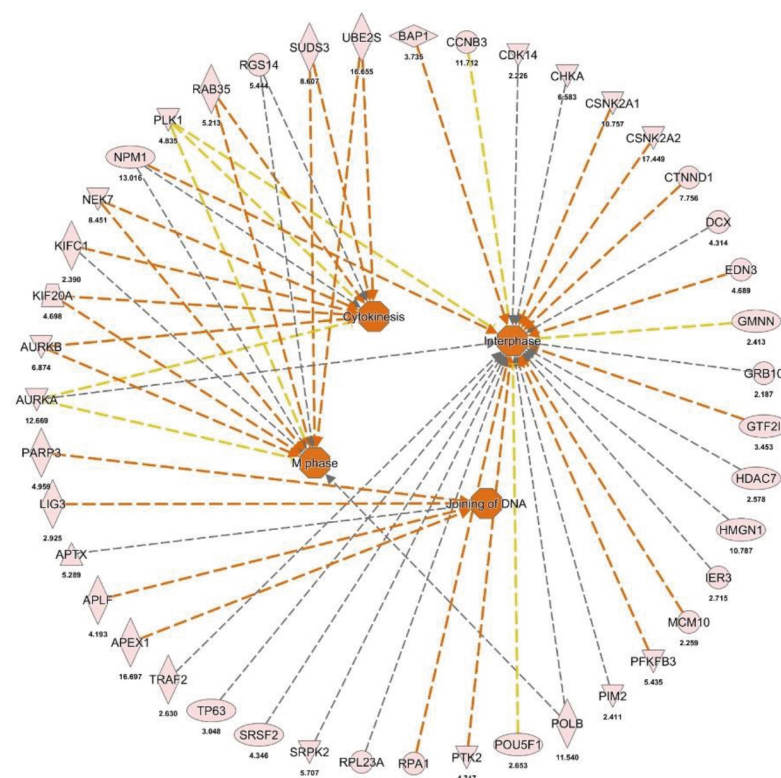

**C 75 autoantigens involved in DNA replication, recombination, and repair**

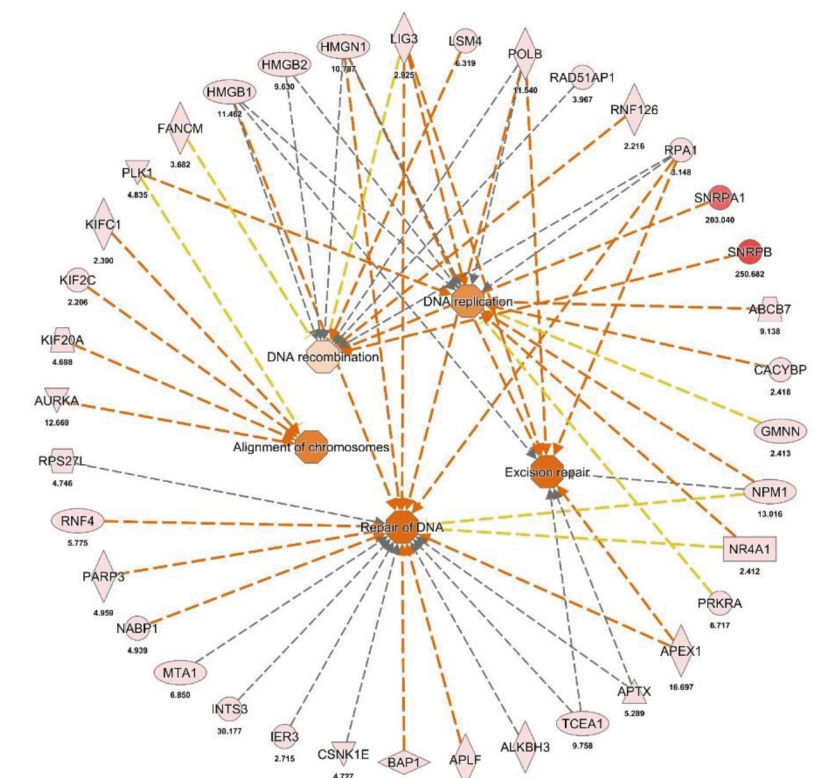

|             |               |  |                                                                                                                    |  |        |  |                      |  |                         |  |                        |
|-------------|---------------|--|--------------------------------------------------------------------------------------------------------------------|--|--------|--|----------------------|--|-------------------------|--|------------------------|
|             | Complex/group |  | Growth factor                                                                                                      |  | Kinase |  | Peptidase            |  | Transcription regulator |  | Transmembrane receptor |
|             | Enzyme        |  | Ion channel                                                                                                        |  | Other  |  | Phosphatase          |  | Translation regulator   |  | Cytokine               |
| <b>More</b> | <b>Less</b>   |  | Protein-protein interaction and correlation                                                                        |  |        |  | Direct interaction   |  |                         |  |                        |
|             | Upregulated   |  | Activation, causation, expression, localization, modification, molecular cleavage, phosphorylation, and regulation |  |        |  | Indirect interaction |  |                         |  |                        |
|             | Downregulated |  |                                                                                                                    |  |        |  |                      |  |                         |  |                        |
