# Supplementary material for: Novel Autoantibodies Related to Cell Death and DNA Repair Pathways in Systemic Lupus Erythematosus
Source: PubMed Central journal article supplement (PMC6818352; doi:10.1016/j.gpb.2018.11.004), 2019-09-05

### A Autoantigens associated with cell death/apoptosis/necrosis

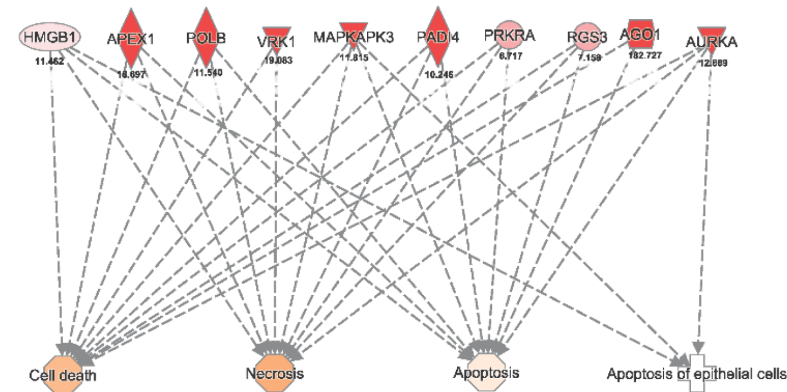

### B Autoantigens associated with DNA repair

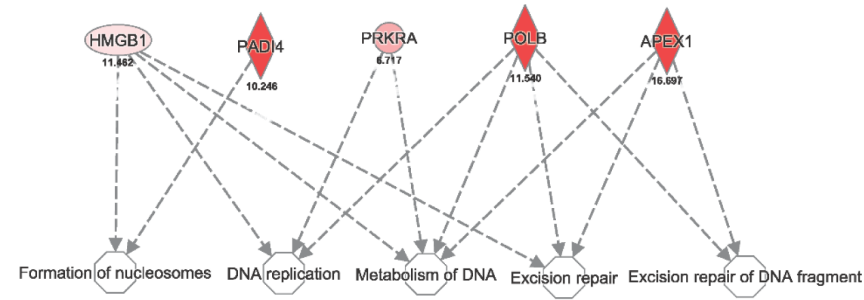

### C Autoantigens associated with cell cycle

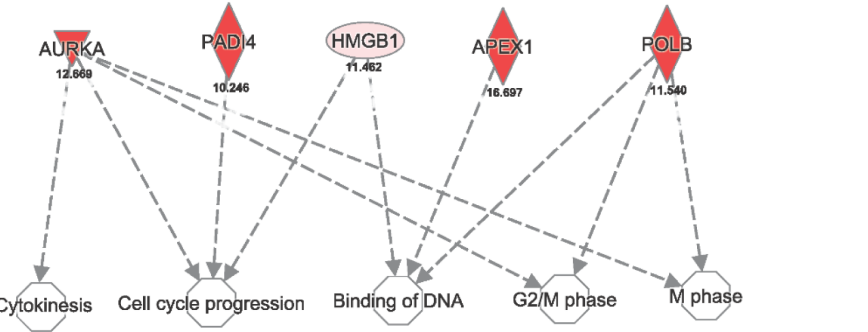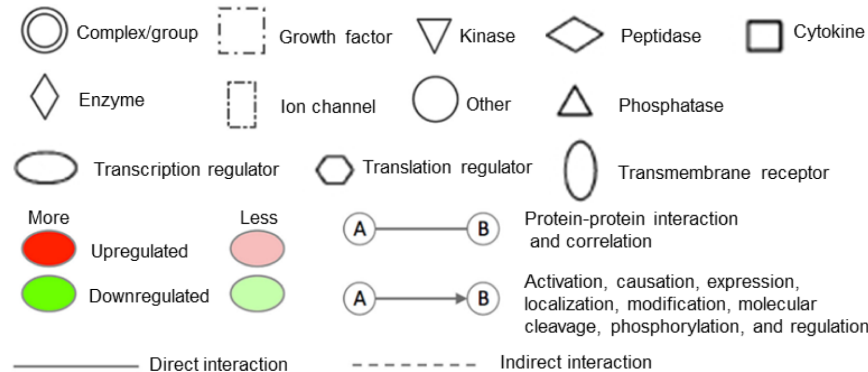

### D Autoantigens implicated in base extension repair pathway

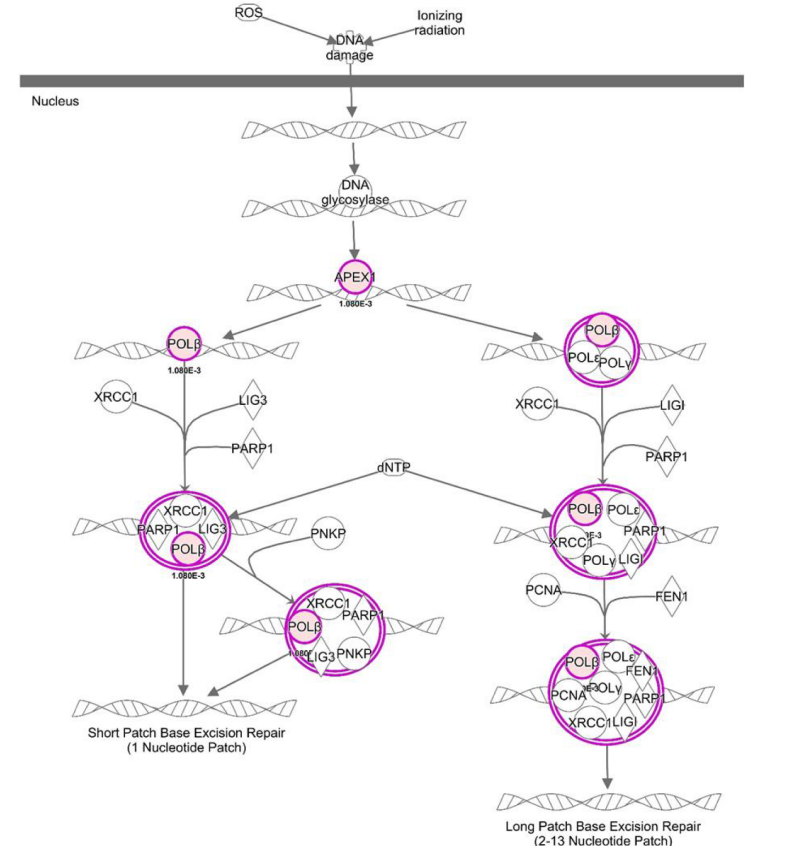

Supplement: mmc3.pdf [file mmc3.pdf]
